# Supplementary material for: Phosphatidylethanolamine and Cardiolipin Differentially Affect the Stability of Mitochondrial Respiratory Chain Supercomplexes
Source: PubMed Central journal article supplement — J Mol Biol. 2012 Nov 9;423-248(5):677–86. doi: 10.1016/j.jmb.2012.09.001 (PMC3480645; doi:10.1016/j.jmb.2012.09.001), 2012-11-09
Supplement: mmc1.pdf [file mmc1.pdf]

## Supplementary Material

### Phosphatidylethanolamine and Cardiolipin Differentially Affect the Stability of Mitochondrial Respiratory Chain Supercomplexes

Böttinger, L. *et al.*

#### Supplementary Figure Legends

**Supplementary Fig. S1.** Growth and phospholipid distribution of wild-type, *psd1* $\Delta$  and *psd1* $\Delta$  *psd2* $\Delta$  yeast cells. (a) Growth of wild-type, *psd1* $\Delta$  and *psd1* $\Delta$  *psd2* $\Delta$  yeast cells (serial dilutions) was analyzed on the indicated growth media and temperatures. YPD: 1% (w/v) yeast extract, 2% (w/v) Bacto Peptone and 2% (w/v) glucose; YPG: 1% (w/v) yeast extract, 2% (w/v) Bacto Peptone and 3% (v/v) glycerol; YPLac: 1% (w/v) yeast extract, 2% (w/v) Bacto Peptone, 2.2% (v/v) lactic acid, 0.05% (w/v) glucose, 0.05% (w/v) CaCl<sub>2</sub>, 0.1% (w/v) KH<sub>2</sub>PO<sub>4</sub>, 0.1% (w/v) NH<sub>4</sub>Cl, 0.05% (w/v) NaCl, 0.8% (w/v) NaOH, pH 5.0. (b) The phospholipid composition of wild-type, *psd1* $\Delta$ , *psd1* $\Delta$  *psd2* $\Delta$  and *crd1* $\Delta$  cell extracts was determined as described.<sup>69,71,72</sup> Mean values with standard error of the mean are shown (n = 4). DMPE, dimethylphosphatidylethanolamine; LP, lysophospholipids; PA, phosphatidic acid; PC, phosphatidylcholine; PG, phosphatidylglycerol; PI, phosphatidylinositol; PS, phosphatidylserine. (c) Inner membrane vesicles from wild-type, *psd1* $\Delta$ , *psd1* $\Delta$  *psd2* $\Delta$  and *crd1* $\Delta$  mitochondria were isolated by sucrose gradient centrifugation.<sup>70</sup> Phospholipids were extracted and the total phospholipid content was determined as described<sup>73</sup>. Shown are the mean values of two determinations with range.

**Supplementary Fig. S2.** Steady-state levels of proteins in wild-type, *psd1* $\Delta$  and *psd1* $\Delta$  *psd2* $\Delta$  yeast mitochondria. The indicated amounts (total protein) of wild-type,

*psd1* $\Delta$  and *psd1* $\Delta$  *psd2* $\Delta$  mitochondria were subjected to SDS-PAGE. Proteins were detected by Western blotting using the indicated antibodies.

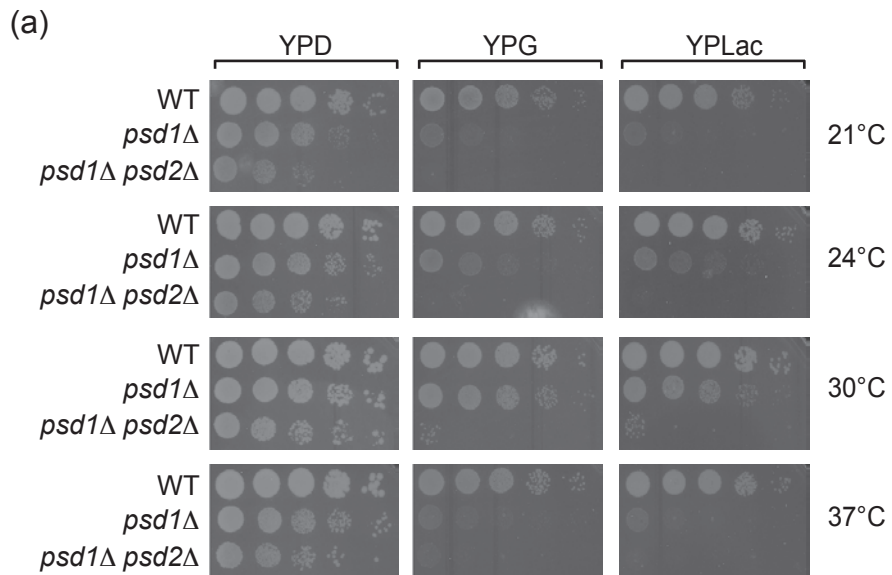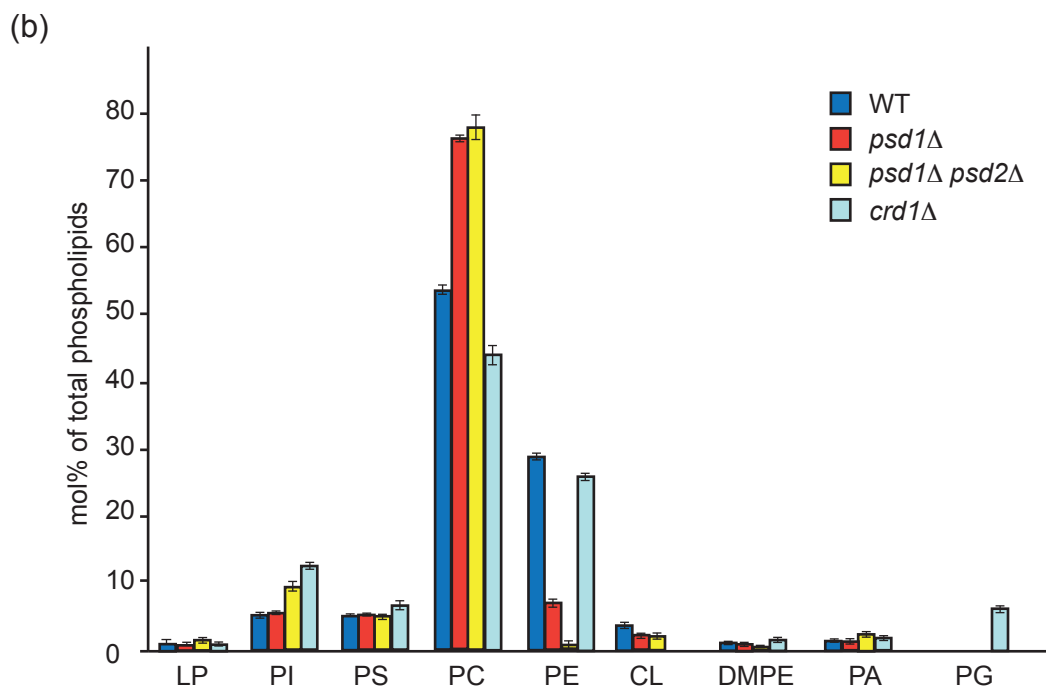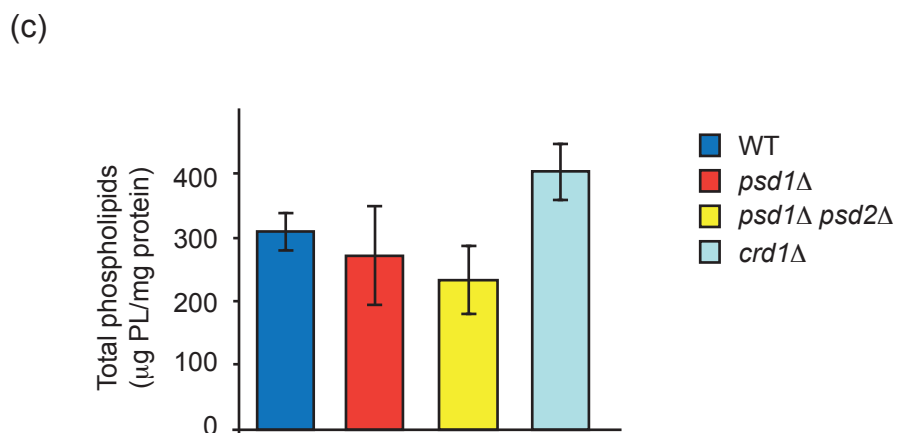

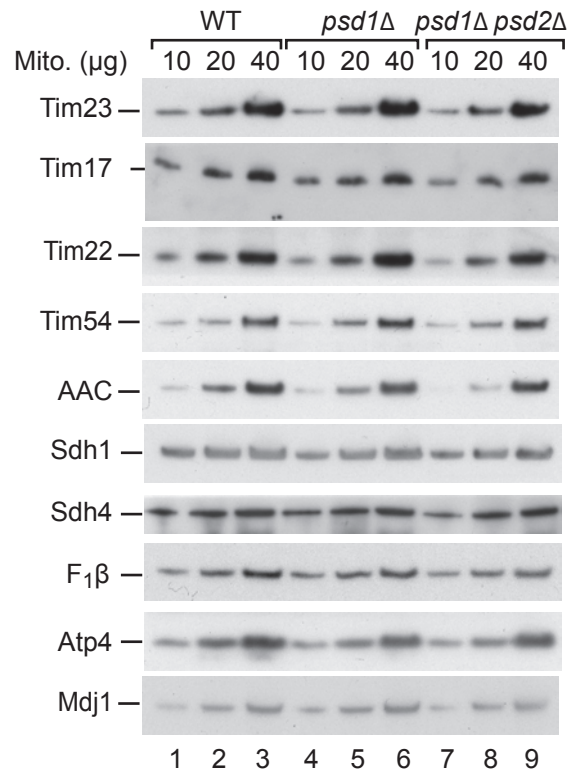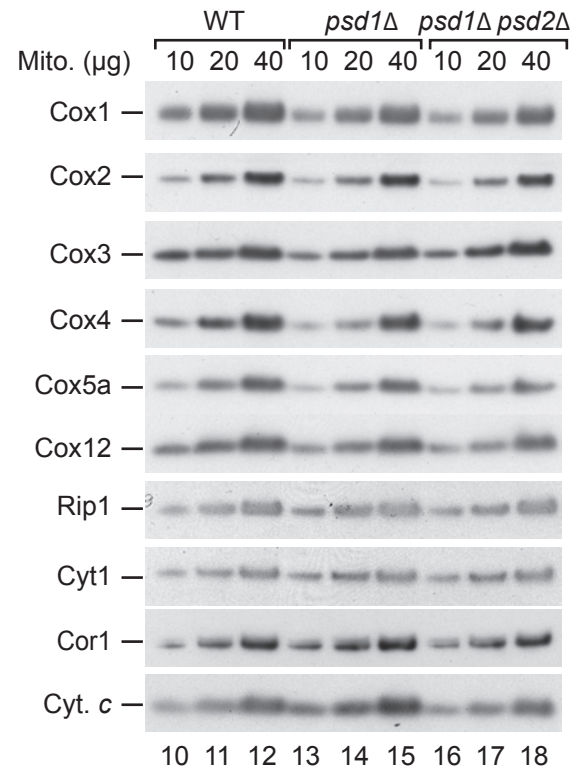

Böttinger et al., Figure S2
